# Supplementary material
Source: PubMed Central journal article supplement (PMC8162679)

## Supplemental Tables and Figures

### Supplemental Tables

Supplemental Table 1. Clinical characteristics of RA patients without and with high coronary artery calcium score

Supplemental Table 2. Logistic regression model characteristics for prediction of presence of coronary calcium in patients with RA

Supplemental Table 3. Logistic regression model characteristics for prediction of presence of high-risk coronary calcium in patients with RA

Supplemental Table 4. Plasma miRNA qPCR-based concentrations based on coronary calcium measurements

Supplemental Table 5. Univariate relationship between miRNA plasma concentration and cardiovascular risk factors

Supplemental Table 6. Top canonical pathways containing upstream regulators of the miRNA panel

Supplemental Table 7. Top functions of upstream regulators of the atherosclerosis panel miRNAs

Supplemental Table 8. Top predicted canonical pathway targets of the atherosclerosis panel miRNAs

Supplemental Table 9. Top predicted function targets of atherosclerosis panel miRNAs

### Supplemental Figures

Supplemental Figure 1. Upstream regulators of the atherosclerosis miRNA panel

Supplemental Figure 2. Panel miRNAs are predicted to regulate atherosclerosis

Supplemental Table 1. Clinical characteristics of RA patients without and with high coronary artery calcium score

|                            | Without high<br>coronary calcium<br>(n=99) | With high coronary<br>calcium (n=62) | P value |
|----------------------------|--------------------------------------------|--------------------------------------|---------|
| Age, years                 | 50 [42, 60]                                | 58 [52, 67]                          | <0.001  |
| Sex, female                | 75 (76)                                    | 36 (58)                              | 0.03    |
| Race, Caucasian            | 88 (89)                                    | 55 (89)                              | 0.99    |
| DAS28, units               | 3.46 [2.39, 4.40]                          | 4.16 [2.92, 5.21]                    | 0.01    |
| RF, positive               | 62 (65)                                    | 48 (80)                              | 0.07    |
| hsCRP, mg/L                | 3 [1, 8]                                   | 6 [2, 16]                            | 0.006   |
| Disease duration, years    | 3 [2, 14]                                  | 12 [2, 20]                           | 0.004   |
| Larsen score, points       | 1 [0, 14]                                  | 2 [0, 18]                            | 0.49    |
| Coronary artery disease, # | 3 (3)                                      | 14 (23)                              | <0.001  |
| Hypertension, presence     | 42 (42)                                    | 41 (66)                              | 0.006   |
| Systolic BP, mmHg          | 130 [116, 144]                             | 137 [123, 151]                       | 0.02    |
| Diastolic BP, mmHg         | 74 [68, 81]                                | 76 [69, 87]                          | 0.34    |
| Waist-hip ratio, units     | 0.84 [0.79, 0.92]                          | 0.93 [0.86, 0.99]                    | <0.001  |
| BMI, kg/m <sup>2</sup>     | 28.3 [23.9, 33.3]                          | 28.3 [24.0, 31.5]                    | 0.46    |

|                          |                |                |        |
|--------------------------|----------------|----------------|--------|
| Total cholesterol, mg/dL | 183 [155, 205] | 188 [157, 216] | 0.47   |
| HDL cholesterol, mg/dL   | 43 [37, 55]    | 43 [36, 51]    | 0.43   |
| LDL cholesterol, mg/dL   | 107 [88, 134]  | 114 [92, 136]  | 0.25   |
| Triglycerides, mg/dL     | 108 [80, 154]  | 112 [81, 157]  | 0.75   |
| DMII, presence           | 6 (6)          | 12 (19)        | 0.02   |
| Anti-hypertensive, use   | 25 (25)        | 35 (56)        | <0.001 |
| Corticosteroid, use      | 55 (56)        | 32 (52)        | 0.74   |
| Methotrexate, use        | 77 (78)        | 38 (61)        | 0.04   |
| Anti-TNF, use            | 21 (21)        | 10 (16)        | 0.55   |

---

High coronary artery calcium was defined as  $\geq 300$  Agatston units or  $\geq 75^{\text{th}}$  percentile for age, sex and ethnicity. Data are presented as median [interquartile range] for continuous variables and number (percent) for categorical variables. Abbreviations: RA= rheumatoid arthritis, DAS28=disease activity score based on 28 joints, RF=rheumatoid factor, hsCRP=high sensitivity C-reactive protein, ESR=erythrocyte sedimentation rate, BP=blood pressure, BMI=body mass index, DMII= diabetes mellitus type 2, TNF=tumor necrosis factor alpha. Larsen score is available for 94 subjects (54 without high coronary artery calcium and 39 with high coronary artery calcium).

Supplemental Table 2. Logistic regression model characteristics for prediction of presence of coronary calcium in patients with RA

|                            | Odds ratio (95% confidence interval) |
|----------------------------|--------------------------------------|
| Age                        | 8.55 (2.72, 26.89)                   |
| Sex (male: female)         | 5.79 (2.02, 16.54)                   |
| DAS28-ESR score            | 1.78 (0.97, 3.26)                    |
| ACC/AHA 10-year risk score | 1.45 (0.51, 4.14)                    |
| Diabetes                   | 1.88 (0.38, 9.22)                    |
| let-7c-5p                  | 1.06 (0.80, 1.40)                    |
| miR-30e-5p                 | 1.32 (0.93, 1.87)                    |
| miR-4446                   | 1.48 (0.92, 2.37)                    |
| miR-126-5p                 | 1.10 (0.73, 1.64)                    |
| miR-125a-5p                | 1.57 (0.77, 3.20)                    |
| miR-3168                   | 0.60 (0.35, 1.03)                    |
| miR-425-5p                 | 0.74 (0.37, 1.48)                    |
| miR-30c-5p                 | 1.12 (0.98, 1.29)                    |

The odds ratio presented is per 1 interquartile range increase for continuous variables (age, DAS28-ESR, ACC/AHA 10-year risk score, and miRNAs) and male versus female for sex and presence versus absence of diabetes. Data from logistic regression model including all listed terms.

Supplemental Table 3. Logistic regression model characteristics for prediction of presence of high coronary calcium in patients with RA

|                            | Odds ratio (95% confidence interval) |
|----------------------------|--------------------------------------|
| Age                        | 2.36 (0.94, 5.90)                    |
| Sex                        | 3.06 (1.30, 7.18)                    |
| DAS28-ESR                  | 1.46(0.85, 2.50)                     |
| ACC/AHA 10-year risk score | 1.13 (0.54, 2.37)                    |
| Diabetes                   | 2.14 (0.60, 7.67)                    |
| let-7c-5p                  | 1.16 (0.85, 1.58)                    |
| miR-125a-5p                | 1.63 (0.85, 3.12)                    |
| miR-126-3p                 | 2.19 (0.81, 5.92)                    |
| miR-126-5p                 | 0.87 (0.53, 1.44)                    |
| miR-30a-5p                 | 0.72 (0.26, 2.02)                    |
| miR-30e-5p                 | 0.85 (0.54, 1.35)                    |
| miR-3168                   | 0.74 (0.49, 1.12)                    |
| miR-425-5p                 | 0.54 (0.24, 1.20)                    |
| miR-4446                   | 1.45 (0.94, 2.24)                    |

The odds ratio presented is per 1 interquartile range increase for continuous variables (age, DAS28-ESR, ACC/AHA 10-year risk score, and miRNAs) and male versus female for sex and presence versus absence of diabetes. Data from logistic regression model including all listed terms. Supplemental Table 4. Plasma miRNA qPCR-based concentrations based on coronary calcium measurements

|             | Coronary artery calcium     |                 |      | High coronary artery calcium |                 |      |
|-------------|-----------------------------|-----------------|------|------------------------------|-----------------|------|
|             | Geometric mean (95% CI), fM |                 | P    | Geometric mean (95% CI), fM  |                 | P    |
|             | Not present                 | Present         |      | Not present                  | Present         |      |
| let-7c-5p   | 188 (108, 327)              | 242 (177, 331)  | 0.47 | 198 (127, 310)               | 242 (163, 360)  | 0.80 |
| miR-125a-5p | 34 (28, 40)                 | 41 (35, 47)     | 0.31 | 36 (31, 41)                  | 40 (33, 48)     | 0.97 |
| miR-126-3p  | 272 (180, 413)              | 338 (239, 479)  | 0.05 | 291 (207, 408)               | 327 (208, 512)  | 0.12 |
| miR-126-5p  | 553 (325, 942)              | 694 (469, 1027) | 0.17 | 604 (389, 936)               | 650 (398, 1059) | 0.48 |
| miR-30a-5p  | 113 (86, 149)               | 119 (92, 155)   | 0.55 | 115 (91, 146)                | 118 (86, 163)   | 0.79 |
| miR-30c-5p  | 455 (387, 535)              | 420 (350, 502)  | 0.56 | 461 (392, 541)               | 401 (334, 480)  | 0.27 |
| miR-30e-5p  | 84 (62, 113)                | 98 (78, 124)    | 0.20 | 88 (67, 114)                 | 96 (76, 122)    | 0.26 |
| miR-3168    | 103 (90, 118)               | 102 (88, 117)   | 0.97 | 107 (94, 121)                | 96 (82, 112)    | 0.27 |
| miR-425-5p  | 15 (5, 32)                  | 24 (12, 50)     | 0.44 | 15 (7, 32)                   | 24 (10, 56)     | 0.61 |
| miR-4446-3p | 5 (3, 8)                    | 7 (5, 10)       | 0.64 | 5 (3, 7)                     | 7 (5, 11)       | 0.25 |

CI= confidence interval. fM=femtomolar concentration.

Supplemental Table 5. Univariate relationship between miRNA plasma concentration and cardiovascular risk factors (as dependent variables)

|                                | let-7c-5p              | miR-125a-5p            | miR-126-3p             | miR-126-5p            | miR-30a-5p             | miR-30c-5p            | miR-30e-5p             | miR-3168               | miR-425-5p             | miR-4446               |
|--------------------------------|------------------------|------------------------|------------------------|-----------------------|------------------------|-----------------------|------------------------|------------------------|------------------------|------------------------|
| Age, years                     | -0.06<br>(-0.56, 0.43) | 1.05<br>(-0.54, 2.63)  | -0.02<br>(-1.53, 1.48) | 0.29<br>(-0.35, 0.93) | -0.83<br>(-2.58, 0.92) | 0.18<br>(-0.24, 0.6)  | 0.23<br>(-0.64, 1.1)   | 0.5<br>(-0.77, 1.77)   | -1.09<br>(-2.38, 0.2)  | -0.59<br>(-2.04, 0.86) |
| Hypertension, presence         | 0.96<br>(0.85, 1.07)   | 1.15<br>(0.87, 1.53)   | 0.92<br>(0.71, 1.19)   | 0.69<br>(0.51, 0.94)  | 0.85<br>(0.63, 1.16)   | 1.01<br>(0.94, 1.09)  | 0.98<br>(0.84, 1.14)   | 1.1<br>(0.88, 1.37)    | 0.8<br>(0.63, 1.02)    | 1.13<br>(0.87, 1.46)   |
| Total cholesterol, mg/dl       | 0.53<br>(-1.1, 2.16)   | 1.8<br>(-3.44, 7.03)   | 6.45<br>(1.54, 11.36)  | 0.46<br>(-1.66, 2.58) | 4.83<br>(-0.93, 10.6)  | 0.87<br>(-0.54, 2.27) | 1.36<br>(-1.5, 4.22)   | -0.1<br>(-4.43, 4.23)  | 3.59<br>(-0.67, 7.84)  | -1.68<br>(-6.46, 3.1)  |
| HDL, mg/dl                     | 0.32<br>(-0.25, 0.9)   | -0.29<br>(-2.14, 1.55) | 0.82<br>(-0.93, 2.57)  | 0.21<br>(-0.54, 0.95) | 0.63<br>(-1.41, 2.67)  | 0.23<br>(-0.27, 0.72) | -0.26<br>(-1.27, 0.74) | -0.71<br>(-2.23, 0.81) | 0.82<br>(-0.68, 2.33)  | -0.32<br>(-2, 1.37)    |
| LDL, mg/dl                     | -0.21<br>(-1.61, 1.2)  | 0.8<br>(-3.71, 5.32)   | 4.06<br>(-0.21, 8.32)  | 0.23<br>(-1.59, 2.06) | 3.11<br>(-1.87, 8.09)  | 0.58<br>(-0.64, 1.8)  | 0.95<br>(-1.52, 3.42)  | -0.38<br>(-4.11, 3.36) | 1.23<br>(-2.46, 4.92)  | 0.32<br>(-3.8, 4.45)   |
| Triglycerides, mg/dl           | 1.01<br>(0.99, 1.03)   | 1.06<br>(0.99, 1.14)   | 1.07<br>(1, 1.15)      | 1<br>(0.97, 1.03)     | 1.05<br>(0.97, 1.14)   | 1<br>(0.98, 1.02)     | 1.03<br>(0.99, 1.07)   | 1.04<br>(0.98, 1.11)   | 1.05<br>(0.99, 1.12)   | 0.95<br>(0.89, 1.02)   |
| BMI, kg/m <sup>2</sup>         | 0.23<br>(-0.05, 0.5)   | 0.07<br>(-0.81, 0.96)  | -0.01<br>(-0.85, 0.83) | 0<br>(-0.35, 0.36)    | 0.11<br>(-0.86, 1.09)  | 0.08<br>(-0.16, 0.31) | 0.06<br>(-0.42, 0.55)  | 0.82<br>(0.12, 1.52)   | -0.06<br>(-0.78, 0.66) | -0.17<br>(-0.98, 0.64) |
| Waist-hip ratio, units         | 0<br>(0, 0.01)         | 0.01<br>(0, 0.02)      | 0.01<br>(0, 0.03)      | 0<br>(-0.01, 0.01)    | 0.02<br>(0, 0.03)      | 0<br>(0, 0.01)        | 0.01<br>(0, 0.01)      | 0.02<br>(0.01, 0.03)   | 0<br>(-0.01, 0.01)     | 0.01<br>(0, 0.02)      |
| Diabetes mellitus II, presence | 0.97<br>(0.79, 1.2)    | 1.34<br>(0.92, 1.94)   | 1.2<br>(0.8, 1.8)      | 0.98<br>(0.77, 1.25)  | 1.17<br>(0.72, 1.89)   | 1.02<br>(0.92, 1.13)  | 0.98<br>(0.74, 1.31)   | 1.28<br>(0.96, 1.7)    | 0.67<br>(0.38, 1.2)    | 0.95<br>(0.6, 1.51)    |
| Creatinine, mg/dl              | 0<br>(-0.01, 0.01)     | 0.05<br>(0.01, 0.08)   | 0.03<br>(0, 0.06)      | 0.01<br>(0, 0.02)     | 0.01<br>(-0.02, 0.05)  | 0<br>(-0.01, 0)       | 0.02<br>(0, 0.03)      | 0.02<br>(-0.01, 0.04)  | 0<br>(-0.03, 0.02)     | 0.01<br>(-0.02, 0.04)  |
| hsCRP, mg/l                    | 1.02<br>(0.94, 1.11)   | 0.98<br>(0.76, 1.27)   | 1.38<br>(1.08, 1.75)   | 1.06<br>(0.96, 1.18)  | 1.3<br>(0.98, 1.73)    | 1.01<br>(0.95, 1.09)  | 1.02<br>(0.88, 1.17)   | 0.9<br>(0.73, 1.1)     | 1.1<br>(0.89, 1.36)    | 0.93<br>(0.74, 1.17)   |

The data is presented as estimated effect size (95% confidence interval) per interquartile range increase in each of miRNA plasma concentration (based on qPCR)

for continuous dependent variables or odds ratio (95% confidence interval) per interquartile range increase in the miRNA. Triglycerides and hsCRP were

analyzed on a log scale and the effect size with 95% confidence intervals were back-transformed to the original scale. Abbreviations: HDL=high density

lipoprotein, LDL=low density lipoprotein, BMI=body mass index, hsCRP=high sensitivity C-reactive protein.



Supplemental Table 6. Top canonical pathways containing upstream regulators of the miRNA panel

| Canonical Pathway                                                              | # molecules | Members                                                                                                   |
|--------------------------------------------------------------------------------|-------------|-----------------------------------------------------------------------------------------------------------|
| HOTAIR Regulatory Pathway                                                      | 13          | AGO1, AGO2, AGO3, AGO4, ARGONAUTE, DNA-methyltransferase, Hdac, Histone h3, let-7, MET, NFKB1, TGFB1, YY1 |
| EIF2 Signaling                                                                 | 12          | AGO1, AGO2, AGO3, AGO4, ARGONAUTE, HRAS, RPL13, RPLP0, RPLP1, RPLP2, RPS15, Ubiquitin                     |
| Senescence Pathway                                                             | 10          | ETS1, ETS2, HRAS, JUN, NFKB1, Rb, SERPINE1, SMAD3, TGFB1, TP53                                            |
| Glucocorticoid Receptor Signaling                                              | 8           | Histone h3, HRAS, JUN, NFKB1, SERPINE1, SMAD3, SMARCA4, TGFB1                                             |
| Role of Macrophages, Fibroblasts and Endothelial Cells in Rheumatoid Arthritis | 8           | APC, F2RL1, HRAS, JUN, MYD88, NFKB1, TGFB1, TNFRSF1B                                                      |

Supplemental Table 7. Top functions of upstream regulators of the atherosclerosis panel miRNAs

| Top functions                          | P-value   | # molecules |
|----------------------------------------|-----------|-------------|
| Expression of RNA                      | 8.6E-28   | 58          |
| Fibrosis                               | 7.22 E-26 | 33          |
| Transcription                          | 4.07 E-23 | 52          |
| Transcription of RNA                   | 4.88 E-22 | 48          |
| Cell proliferation of tumor cell lines | 9.31 E-22 | 50          |
| Apoptosis                              | 3.48 E-21 | 62          |
| Expression of protein                  | 9.65 E-21 | 26          |
| Morphology of cardiovascular system    | 2.46 E-20 | 33          |

Supplemental Table 8. Top predicted canonical pathway targets of the atherosclerosis panel miRNAs

| Canonical Pathway                                        | # molecules | Members                                                     |
|----------------------------------------------------------|-------------|-------------------------------------------------------------|
| Colorectal Cancer Metastasis Signaling                   | 10          | Akt, BCL2L1, BIRC5, CCND1, IL6, JUN, MMP7, PIK3R2, RAS, TNF |
| Molecular Mechanisms of Cancer                           | 8           | Akt, BCL2L1, CCND1, E2F3, IRS1, JUN, PIK3R2, RAS            |
| Systemic Lupus Erythematosus In B Cell Signaling Pathway | 8           | Akt, BCL2L1, CCND1, IL6, JUN, PIK3R2, RAS, TNF              |
| Glucocorticoid Receptor Signaling                        | 7           | Akt, BCL2L1, IL6, JUN, PIK3R2, RAS, TNF                     |
| T Cell Exhaustion Signaling Pathway                      | 7           | Akt, BCL6, IL6, JUN, PIK3R2, PRDM1, RAS                     |

Supplemental Table 9. Top predicted function targets of atherosclerosis panel miRNAs

| Top functions                | P-value   | # molecules |
|------------------------------|-----------|-------------|
| Invasion of cells            | 4.50 E-30 | 30          |
| Invasion of tumor cell lines | 2.98 E-27 | 27          |
| Cell movement                | 2.46 E-22 | 32          |
| Benign pelvic disease        | 4.01E-22  | 19          |
| Migration of cells           | 4.26E-22  | 31          |
| Fibrosis                     | 1.97E-21  | 20          |
| Atherosclerosis              | 6.56 E-9  | 11          |

Supplemental Figure 1. Upstream regulators of the atherosclerosis miRNA panel

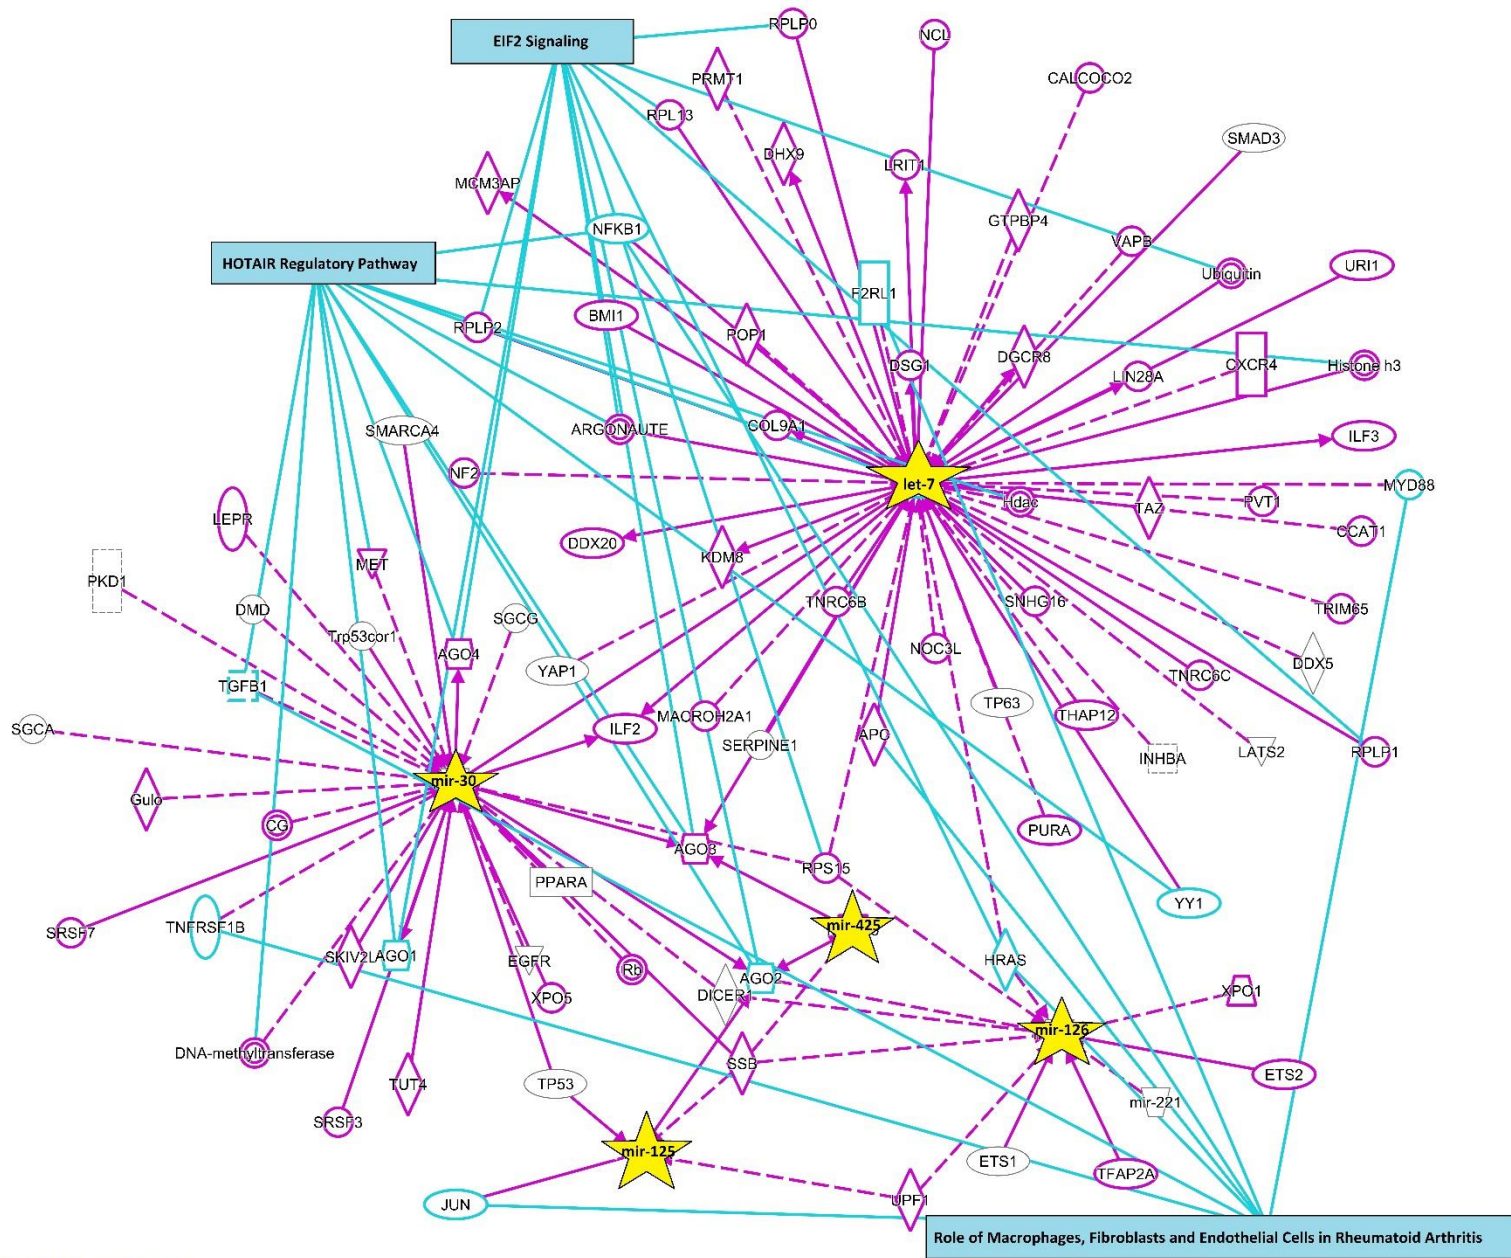

Supplemental Figure 2. Panel miRNAs are predicted to regulate atherosclerosis

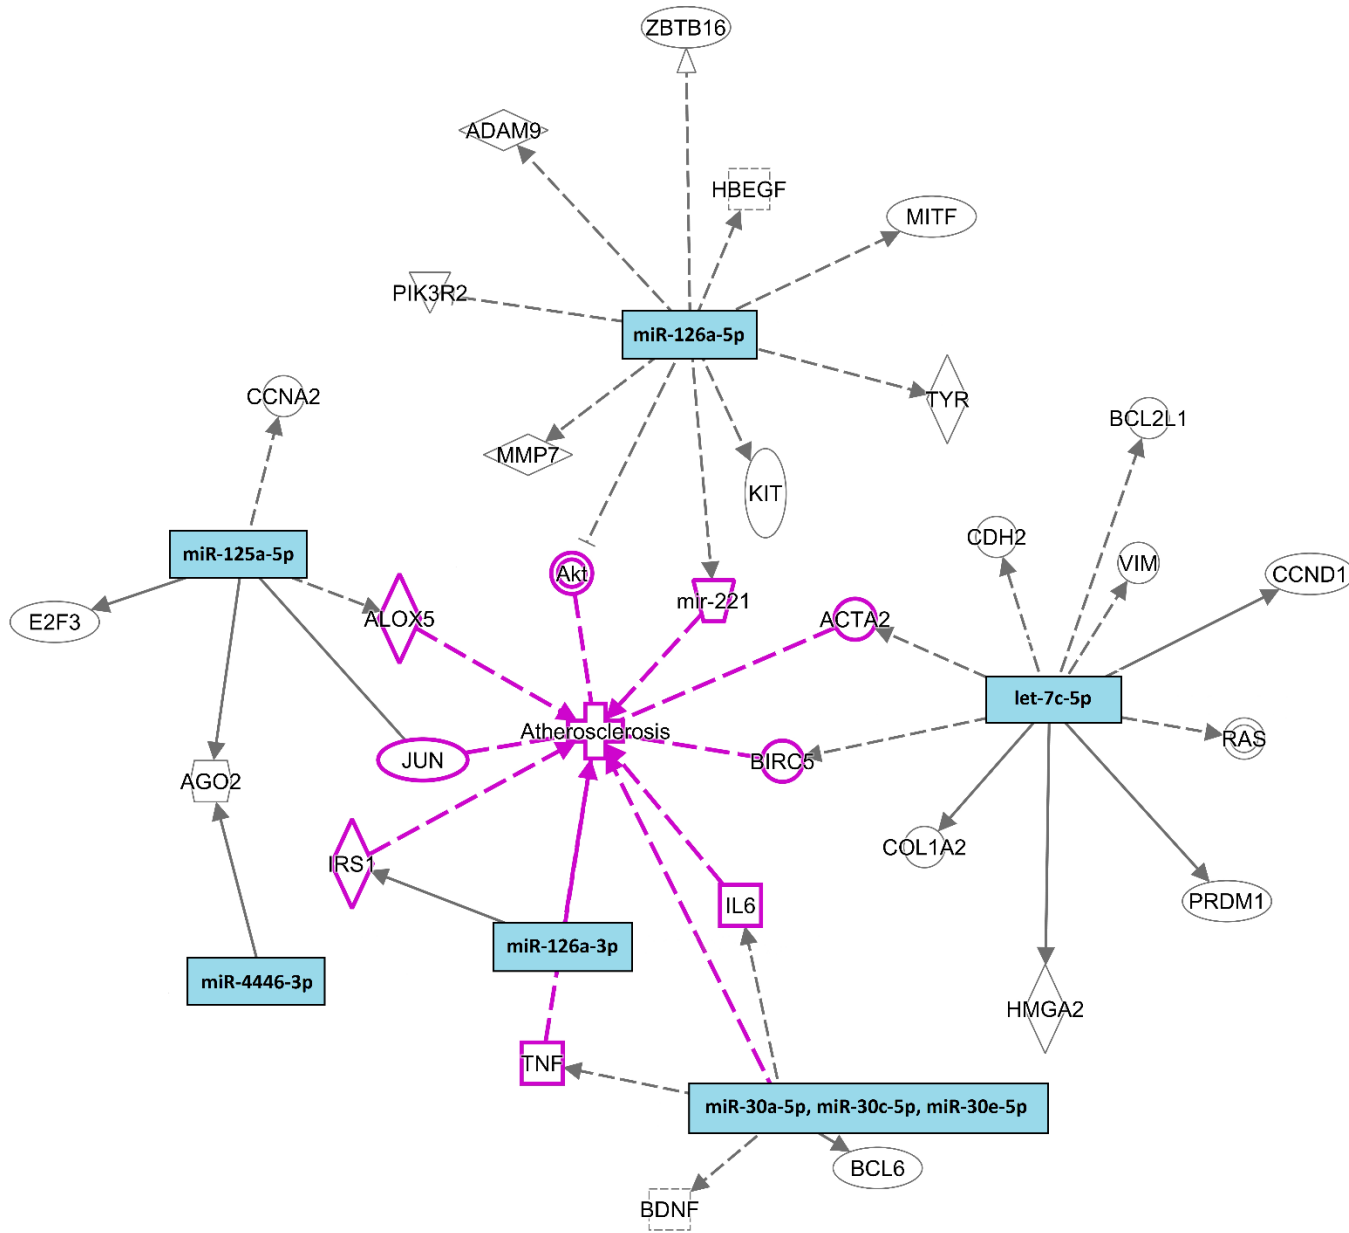

Supplement: NIHMS1699150-supplement-Supplemental_materials.pdf [file NIHMS1699150-supplement-Supplemental_materials.pdf]
